# Supplementary material for: Temporal Trends and Factors Associated With Cardiovascular Drug Development, 1990 to 2012
Source: PubMed Central journal article supplement — JACC Basic Transl Sci. 2016 Aug 29;1(5):301–8. doi: 10.1016/j.jacbts.2016.03.012 (PMC6113354; doi:10.1016/j.jacbts.2016.03.012), 2016-08-29
Supplement: mmc1.pdf [file mmc1.pdf]

### Supplemental Figure 1. Temporal Trends in Proportion of Clinical Trials for New Cardiovascular Drugs Started by Small and Medium-Sized Companies

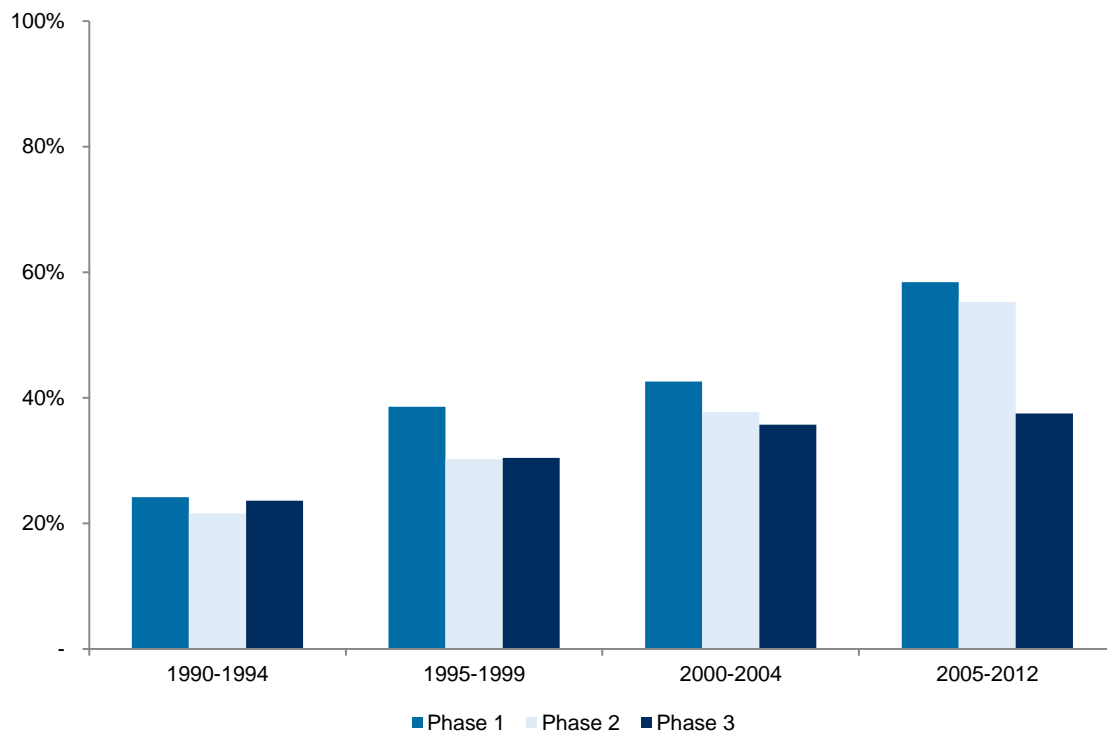

Notes: Small and medium-sized companies are firms with annual gross revenues of less than \$1 billion at the start of the clinical trial.

**Supplemental Figure 2. Temporal Trends in Proportion of Phase 3 Cardiovascular Clinical Trials Accounted for Drugs Targeting a Novel Biological Pathway**

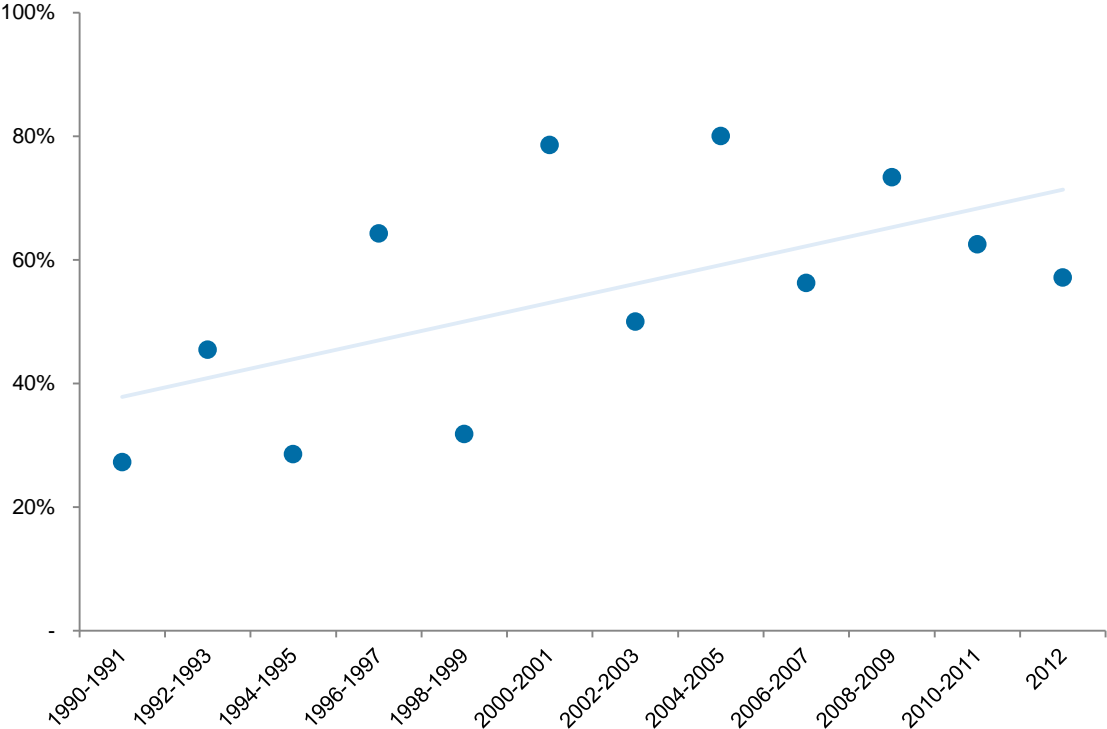

Notes: Year represents year of trial start. Definitions of a novel biological pathway are provided in the Methods section. Linear trend line is shown in light blue.
